1 **Title:** Soil type shapes unique pathogen communities on nearby populations of a California  
2 native bunchgrass

3 **Authors:**

4 Johannah E. Farner<sup>1</sup>, Erin R. Spear<sup>1,2</sup>, Erin A. Mordecai<sup>1,3</sup>

5 <sup>1</sup>Biology Department, Stanford University, Stanford, California 94305 USA

6 <sup>2</sup>Biology Department, Regis University, Denver, Colorado 80221 USA

7 <sup>3</sup>E-mail: [emordeca@stanford.edu](mailto:emordeca@stanford.edu)

8 **Abstract**

9         The role of infectious disease in regulating host populations is increasingly recognized,  
10 but the environmental conditions that facilitate versus hinder pathogen-mediated population  
11 regulation remain poorly understood. We compared the relative contributions of soil type and  
12 pathogen community composition to foliar disease burden in a perennial bunchgrass species  
13 found on two distinct soil types that support distinct plant communities in a California grassland.  
14 We hypothesized that populations on different soil types would have significantly different  
15 disease burdens caused by unique pathogen communities. To test this hypothesis, we compared  
16 foliar disease burden and foliar fungal pathogen communities in nearby populations of *Stipa*  
17 *pulchra* found in nonserpentine greenstone soil that is dominated by invasive Mediterranean  
18 grasses, and in serpentine soil, a harsh soil high in heavy metals and low in essential nutrients  
19 that supports a diverse community of native plant species. We analyzed the chemical makeup of  
20 serpentine and nonserpentine plant tissue to understand potential impacts of soil chemistry on  
21 plant health and pathogen community composition. We found that serpentine and nonserpentine  
22 *S. pulchra* experienced consistent, low disease pressure caused by distinct communities of foliar  
23 pathogens, and that serpentine plants, like the soil in which they grew, had elevated Ni and Mg

24 content and decreased C, N, Ca, and P content compared to nonserpentine plants. The results  
25 imply that pathogens are unlikely to regulate the population dynamics of this native plant, and  
26 that pathogen communities are structured either by plant community composition or tissue  
27 chemistry. Local variation in soil type and annually variable conditions associated with high  
28 species turnover in pathogen communities may create a refuge from disease outbreaks for *S.*  
29 *pulchra*, contributing to the low disease burden observed on this and other Mediterranean  
30 grassland species.

## 31 **Introduction**

32 How environmental heterogeneity affects species interactions, and ultimately population  
33 growth, remains a fundamental ecological question. Infectious disease, which arises from  
34 interactions between hosts, parasites, and the environment, is particularly likely to vary across  
35 populations in differing environments. Both biotic factors, such as the phylogenetic structure of  
36 the host community, and abiotic factors, such as elevation, have been associated with the  
37 presence of specific diseases and the severity of their impacts on their hosts (Abbate and  
38 Antonovics 2014, Parker et al. 2015). Additionally, mounting evidence suggests that specific  
39 characteristics of pathogen community structures, including the identities and abundances of the  
40 diseases present in a host population, mediate the outcomes of host – pathogen interactions  
41 (Seabloom et al. 2015, Borer et al. 2016). Together, these observations highlight the importance  
42 of understanding interactions between environmental variation, pathogen community  
43 composition, and pathogen pressure on host populations to assess the potential for disease to  
44 regulate host population dynamics. For plant hosts, such assessments are important both in  
45 conservation and agricultural contexts because identifying populations at high risk for severe  
46 disease outbreaks and applying preventative measures may prevent local species extinctions and  
47 improve crop yields, respectively. While studies have frequently explored the interactions of

48 single host – pathogen pairs under differing abiotic conditions (e.g., Abbate and Antonovics  
49 2014) or the effect of varying pathogen community composition on disease burden (e.g., Telfer  
50 et al. 2010), relationships between abiotic variables and pathogen community structures remain  
51 largely unexplored in natural systems (but see Spear 2017).

52 California grasslands are an ideal model system in which to study interactions between  
53 environmental variation, pathogen community composition, and disease burden because these  
54 plant communities are widespread, exist across a variety of environmental gradients, and include  
55 distinct plant community subtypes (Eviner 2016). Here, we take advantage of the natural  
56 occurrence of the native perennial bunchgrass *Stipa pulchra* on distinct soil types—serpentine,  
57 hosting diverse, native-dominated grassland communities and a nonserpentine greenstone  
58 (hereafter, nonserpentine), dominated by exotic plants—to understand the extent to which soil  
59 type and time influence the landscape of disease encountered by a single plant species, including  
60 foliar fungal pathogen community composition and disease severity.

61 Differences in plant community composition and soil chemistry suggest that *S. pulchra*  
62 populations growing in distinct soil types are likely to host distinct fungal pathogen communities  
63 and/or experience differing disease burdens, particularly if the phenotype of *S. pulchra* is  
64 influenced by the soil in which it grows. *S. pulchra* naturally occurs in both nonserpentine soils  
65 and in relatively rare serpentine soils that host grassland plant communities. These two soil types  
66 differ in their chemistry and host distinct plant communities, resulting in a suite of environmental  
67 differences that may influence pathogen infection, reproduction, and persistence (Huenneke et al.  
68 1990, Harrison and Viers 2007). In contrast to the majority of California grasslands, which are  
69 heavily invaded by exotic species, serpentine grasslands have a diverse array of native species  
70 adapted to chemically and physically harsh soils: low in essential plant nutrients (N, P, K, Ca),  
71 high in heavy metals that are potentially toxic to plants (Co, Ni, Cr, Fe), and rocky and shallow,

72 with poor moisture retention (Proctor and Woodell 1975, Oze et al. 2004, 2008, McNaughton  
73 1968, Harrison and Viers 2007, Eviner 2016).

74 Soil properties determine a variety of factors likely to influence the occurrence and  
75 outcomes of plant infections, including soil moisture levels and plant chemistry and physiology  
76 (Cunningham et al. 1999, McElrone et al. 2005, Smith 2007). Spores of different fungal species  
77 vary in both their ability to survive in dry and moist environments and their tolerance of heavy  
78 metals (Coley-Smith and Cooke 1971, Iram et al. 2009). Moreover, plants of the same species  
79 grown in drier and lower-nutrient soils can have thicker epidermises and higher concentrations of  
80 phenolic compounds, many of which have antifungal properties (Osbourne 1996, Cunningham et  
81 al. 1999). Finally, soil chemistry may influence pathogen infection either through  
82 hyperaccumulation of heavy metals, which can bolster chemical defenses against natural  
83 enemies, or by limiting common mechanisms of plant defense (Springer et al. 2006, Rascio and  
84 Navari-Izzo 2011).

85 In this study, we ask: (1) how does disease burden differ on plants growing in different  
86 soil types? (2) how does the species composition of pathogen communities differ on plants  
87 growing in different soil types? and (3) by what mechanisms—including host community  
88 composition and plant tissue chemistry—does soil type affect disease burden and pathogen  
89 composition? We hypothesize that both disease burden and pathogen species composition differ  
90 on *S. pulchra* individuals growing in serpentine versus nonserpentine soils, either because of  
91 differences in the composition of the surrounding plant community, differences in plant  
92 physiological responses, or both. We further hypothesize that the soil type *S. pulchra* grows in  
93 alters foliar tissue chemistry in ways that may affect disease burden, with higher heavy metal  
94 content and/or lower C, N, and P content in serpentine plants. If so, these foliar chemistry  
95 differences may translate into either (a) higher disease in serpentine plants relative to

96 nonserpentine plants, facilitated by negative impacts of limited plant resource availability on  
97 plant health (as in Springer 2006), or (b) lower disease in serpentine plants due to heightened  
98 chemical and/or physiological plant defenses in response to serpentine soil properties. The results  
99 of this study will aid in assessing disease risk for plant populations in natural and agricultural  
100 contexts by providing information about the spatial and temporal scales over which soil type and  
101 other environmental factors can affect the spread of outbreaks.

## 102 **Methods**

103 All surveys and sample collection took place at Jasper Ridge Biological Preserve (JRBP),  
104 a 485-hectare site in San Mateo County, CA managed by Stanford University (37.4° N, 122.2°  
105 W). JRBP has a Mediterranean climate with cool winters (mean 9.2°C), warm summers (mean  
106 20.1°C), and annually variable precipitation that predominantly occurs in the winter and spring  
107 (averaging 622.5 mm per year) (Ackerly et al. 2002). The growing season occurs during the  
108 rainy season and plants senesce in the early summer. This study was conducted during the  
109 growing seasons from mid-April to mid-May in 2015, 2016, and 2017. There was highly variable  
110 annual precipitation across the three years (491 mm, 604 mm, and 985mm in 2015, 2016, and  
111 2017, respectively; Weather Underground).

112 Substantial populations of *S. pulchra* occur in both serpentine and nonserpentine  
113 grasslands at JRBP (McNaughton 1968). The serpentine plant communities at JRBP are more  
114 diverse than the nearby nonserpentine plant communities and include many native grasses and  
115 forbs, in contrast to the invasive-dominated nonserpentine grasslands (McNaughton 1968). Plant  
116 species commonly found in serpentine grasslands at JRBP include *Stipa pulchra*, *Elymus*  
117 *glaucus*, *Elymus multisetus*, *Eschscholzia californica*, and the invasive grass *Bromus hordeaceus*  
118 (McNaughton 1968, Hobbs and Mooney 1985). The nonnative annual species that dominate the  
119 nonserpentine grasslands but are absent from serpentine grasslands include *Avena barbata*,

120 *Avena fatua*, *Bromus diandrus*, and *Erodium botrys* (McNaughton 1968, Hobbs and Mooney  
121 1985).

### 122 *Quantification of disease*

123 To assess plant disease burden, we quantified the percentage of living leaf area exhibiting  
124 symptoms of fungal disease in serpentine and nonserpentine populations of *S. pulchra*. We  
125 selected three serpentine grassland sites and three nonserpentine grassland sites such that each  
126 serpentine site was paired with a nearby (~170m away) nonserpentine site. Individual sites  
127 within each soil type were >300m apart. Each year, we randomly placed four 5-meter transects at  
128 each site and assessed the infection status of the *S. pulchra* individual nearest each meter mark,  
129 resulting in five individual plants per transect surveyed each year (N = 60 plants per soil type per  
130 year). We visually estimated the percentage of living foliar tissue damaged by pathogens for six  
131 arbitrarily-selected leaves per plant. All survey sites were located along the ridgetop at JRBP,  
132 where serpentine and nonserpentine (greenstone) soils are present in discrete adjacent bands  
133 (Figure 1a, Oze et al. 2004). The relative flatness of the ridgetop ensured that all survey sites  
134 were at roughly the same elevation and had similar slopes, aspects, and water availability (Oze et  
135 al. 2008).

136 We compared the mean percentage of diseased leaf area and proportion of surveyed  
137 leaves with disease in serpentine and nonserpentine *S. pulchra* using Welch's two-tailed t-tests  
138 for the data over all years. We used analysis of variance (ANOVA) to test for the effects of year  
139 on disease levels in serpentine and nonserpentine *S. pulchra*. When ANOVA results were  
140 statistically significant, we used pairwise t-tests with Bonferroni adjustments of p-values to  
141 account for multiple comparisons to identify the interactions contributing to the significant  
142 result.

143 *Isolation and molecular identification of foliar fungal pathogens*

144 To identify the fungal foliar pathogens infecting serpentine and nonserpentine *S. pulchra*,  
145 we harvested one segment of symptomatic leaf tissue for culturing and identification of the  
146 causative fungal pathogen(s) from each surveyed individual with disease. We excised, surface  
147 sterilized, and plated a 2mm<sup>2</sup> square of tissue from each sample at the leading edge of infection.  
148 We observed the plates for growth for eight weeks and isolated morphologically distinct hyphae  
149 into axenic culture. We extracted and sequenced genomic DNA from the ITS region for each  
150 isolate. Fungal isolation and sequencing methods followed Spear and Mordecai (2018). We  
151 estimated taxonomic placement of fungal isolates by grouping sequences into operational  
152 taxonomic units with 97% sequence similarity (OTUs), a proxy for species delineation based on  
153 the range of intraspecific ITS divergence (O'Brien et al. 2005), and then comparing assembled  
154 DNA sequences to the entries in the UNITE fungal database (see Supplemental Information for  
155 additional details).

156 *Analyses of fungal community composition*

157 To characterize pathogen community composition in serpentine and nonserpentine *S.*  
158 *pulchra* populations, we compared the diversity and assessed the similarity of communities of  
159 fungi cultured from the diseased tissue of surveyed plants. To describe fungal community  
160 diversity, we (1) calculated observed taxa richness and Fisher's alpha, a widely used measure of  
161 species richness that is robust to uneven sample sizes (Fisher et al. 1943, Magurran 1988, Hansen  
162 and Coleman 1998); (2) generated taxa accumulation curves to understand sampling efficacy;  
163 and (3) counted the number of fungal isolates in each genus, family, order, and class from each  
164 grassland type. We compared fungal community composition across grassland types and across  
165 years visually, using non-metric multidimensional scaling (NMDS), and statistically, using

166 permutational multivariate analyses of variance (PERMANOVA) with the Adonis and  
167 pairwise.perm.manova functions (Anderson 2001, Oksanen et al. 2016, Hervé 2017). To account  
168 for low sample size in some transects, we considered the combined isolates from two transects at  
169 each site in each year to be a distinct community (for a total of two communities per site per  
170 year) for these analyses. For the NMDS and PERMANOVA analyses, we used the function  
171 vegdist with the abundance-based Chao method, accounting for unsampled species, to create a  
172 matrix of pairwise community dissimilarities (Chao et al. 2016, Oksanen et al. 2016). Finally, we  
173 used the Morisita-Horn index, which is independent of sample size and diversity, to make  
174 pairwise comparisons of similarity within and between the serpentine and nonserpentine fungal  
175 communities from each year (N = 265 isolates, 200 bootstrap replicates) (Wolda 1981, Jost et al.  
176 2011).

#### 177 *Chemical analyses of leaf tissue*

178 We analyzed C, N, Ca, Cr, Mg, Ni, and P content of the foliar tissue of *S. pulchra* grown  
179 in serpentine and nonserpentine soils *in situ* and in pots. In 2016, we collected the youngest fully  
180 expanded and entirely asymptomatic leaf of each individual surveyed in the field (N = 58  
181 nonserpentine, 60 serpentine). We dried the samples at room temperature for three months, then  
182 at 60°C for 48 hours, ground them to a powder, and then dried them again at 60°C for 24 hours.  
183 We measured C and N content of these samples with a Carlo Erba NA-1500 elemental analyzer  
184 using atropine standards.

185 To compare Ca, Cr, Mg, Ni, and P content, which requires more tissue biomass than  
186 could be collected from plants in the field, we used a set of plants grown in pots in the  
187 greenhouse and then moved to JRBP for a separate experiment (see Supplement for additional  
188 information). In total, we grew 480 plants in serpentine soil sourced from our survey sites at



189 JRBP and 480 plants in nonserpentine greenhouse soil (PROMIX HP Mycorrhizae TM High  
190 Porosity Professional Growing Medium, Premier Horticulture Inc.). To ensure that serpentine-  
191 and nonserpentine-grown plants encountered similar soil biota, we triple autoclave-sterilized  
192 serpentine soil (40-minute cycles at 120°C) and then immediately inoculated it with greenhouse  
193 soil in a ratio of 93:7 by weight (serpentine soil treatment; Heinze et al. 2015) and mixed  
194 sterilized serpentine soil into greenhouse soil in the same ratio (nonserpentine soil treatment, to  
195 account for possibility of microorganisms surviving autoclaving). Autoclave sterilization of soil  
196 has been shown to alter physical and chemical properties and thus has the potential to affect our  
197 results. However, the documented instances of autoclaving-induced changes to extractable  
198 levels of the elements we measured, including increased extractable Ca:Mg and decreased  
199 extractable Ni, suggest that this procedure is more likely to increase than decrease the similarity  
200 of nutrient availability in serpentine and nonserpentine soils (Tadros 1957, Wolf et al. 1989,  
201 Abou-Shanab et al. 2003). Therefore, any significant differences observed between the foliar  
202 chemistry of *S. pulchra* grown in autoclaved serpentine and unsterilized nonserpentine soils that  
203 indicate plant tissue chemistry matching soil chemistry should not be due to autoclave  
204 sterilization effects.

205       Elemental content of these plants was measured via inductively coupled plasma optical  
206 emission spectrometry (ICP-OES). Because the minimum amount of leaf tissue for which some  
207 heavy metals can be detected via ICP-OES is 0.5g and most of our *S. pulchra* had a total  
208 aboveground biomass of less than 0.5g, each measurement represents the combined elemental  
209 content of equal weights of oven-dried foliar tissue from two plants. Plants were randomly  
210 selected for analysis from among all individuals with an aboveground biomass of at least 0.29g.  
211 All asymptomatic leaves were removed from each plant's base and processed as described  
212 above. A 0.5g portion of each pooled sample was digested in 10ml of 70% trace metal quality

213 nitric acid with microwave assistance. Digested samples were diluted to 16.7% acid  
214 concentration with DI water and the concentrations of Ca, Cr, Mg, Ni, and P were measured in  
215 parts per billion by a Thermo Scientific iCAP 6300 spectrometer (Thermo Scientific, Waltham,  
216 MA, USA) (Cantarelli et al. 2010).

217 To assess the potential for soil chemistry to mediate plant-pathogen interactions, we  
218 related soil type to leaf tissue chemistry of *in situ* and potted *S. pulchra*, and chemistry of *in situ*  
219 plants to disease burden. We compared the mean mol/kg dried weight of leaf tissue for Ca, Cr,  
220 Mg, and Ni for potted serpentine and nonserpentine plants with Wilcoxon rank sum tests. We  
221 also compared mean C:N and Ca:Mg ratios that are indicative of plant health (Ciompi et al.  
222 1996, Brady et al. 2005). We used Pearson's product-moment correlation to test for significant  
223 monotonic relationships between the amount of diseased tissue observed on individual plants in  
224 the field and their foliar C and N content.

225 All statistical analyses were done in R version 3.4.1. We used the packages ggplot2  
226 (Wickham 2016), vegan (Oksanen et al. 2016), SpadeR (Chao et al. 2016), bipartite (Dormann et  
227 al. 2008), fossil (Vavrek 2011), BiodiversityR (Kindt and Coe 2005), rich (Rossi 2011), and  
228 RVAideMemoire (Hervé 2017).

## 229 **Results**

### 230 *Pathogen damage*

231 Pathogen damage was similarly ubiquitous and low-burden in serpentine and  
232 nonserpentine soils. Every plant surveyed exhibited evidence of foliar fungal-caused disease.  
233 The mean percentage of diseased leaf area observed across all years was 1.66 for nonserpentine  
234 and 1.63 for serpentine *S. pulchra*, respectively ( $t = 0.11$ ,  $df = 356.2$ ,  $p\text{-value} = 0.91$ ; Figure 1b),  
235 and the mean proportion of pathogen-damaged leaves was 0.83 for both soil types. Although the

236 percentage of diseased tissue on serpentine plants increased slightly each year from 2015 to 2017  
237 (F-value = 4.49, p-value = 0.035), the Bonferroni-adjusted p-values for t-tests for each pair of  
238 years were not statistically significant (p-values = 0.16, 0.45, 1.00). There was no statistically  
239 significant effect of year on nonserpentine pathogen damage (F-value = 1.35, p-value=0.246).

240

#### 241 *Fungal pathogen community*

242 We isolated 267 unique fungal isolates from 258 symptomatic tissue pieces with fungal  
243 growth (144 nonserpentine, 114 serpentine from 36 nonserpentine and 34 serpentine transects,  
244 out of 360 total tissue pieces). Of the 267 unique fungal isolates, we successfully sequenced 256  
245 isolates. The sequenced isolates clustered into 30 operational taxonomic units (OTUs) based on  
246 97% sequence similarity, representing 23 genera, 15 families, 8 orders, and 5 fungal classes. The  
247 largest OTU contained 48 isolates and the smallest OTUs consisted of one isolate each. OTUs  
248 are hereafter referred to as “species” (O’Brien et al. 2005).

249 The serpentine fungal community was more diverse than the nonserpentine community at  
250 every taxonomic level (Tables S-1 to S-6). Twenty-two fungal species were isolated from  
251 nonserpentine (Fisher’s alpha = 7.261, 95% CI = 3.597, 10.925) and 24 from serpentine *S.*  
252 *pulchra* (Fisher’s alpha = 9.324, 95% CI = 4.664, 13.983); 16 of these species (53%) were shared  
253 (Figure 2, Tables 1 and S-1). Novel genera were isolated for both community types in every year  
254 of surveying (Table S-6). Species accumulation curves did not approach horizontal asymptotes  
255 for either soil type, and the serpentine curve had a steeper slope than the nonserpentine curve  
256 (Figure S-1). These curves suggest that neither fungal community was fully described, and that  
257 there were more unsampled fungal species associated with the plants growing in serpentine soil  
258 than those in nonserpentine.

259 Both fungal communities were dominated by a few abundant species (isolated >10  
260 times), but the numerically dominant species differed between nonserpentine and serpentine  
261 soils: *Alternaria* sp. 2 and *Ramularia* sp., respectively (Figure S-2, Table S-1). The  
262 nonserpentine community included five abundant species, representing 62% of the isolates,  
263 while the serpentine community included two abundant species, representing 51% of serpentine  
264 isolates (Figure S-2, Table S-1). The serpentine community had a higher proportion of rare  
265 species (<3 isolates) than the nonserpentine community, 63% versus 36%, respectively. One  
266 *Drechslera* species was abundant in the nonserpentine community and rare in the serpentine  
267 (Table S-1).

268 Soil type significantly affected pathogen community composition, based on pairwise  
269 PERMANOVA analysis of two-transect fungal communities and NMDS visualization of  
270 community similarity ( $F = 4.585$ ,  $R^2 = 0.07567$ ,  $p = 0.001$ ; Figure 3). Serpentine fungal  
271 communities were generally more similar to one another than they were to nonserpentine fungal  
272 communities, and vice versa (Figure 3, Table 1).

273 Serpentine fungal community composition was more consistent across years than  
274 nonserpentine fungal community composition (Table 1). While nonserpentine fungal community  
275 similarity was unpredictable between years, with some very dissimilar communities (Morisita-  
276 Horn overlap = 0.295) and some very similar ones (Morisita-Horn overlap = 0.882), serpentine  
277 fungal communities were always relatively similar between years, with Morisita-Horn overlap  
278 ranging from 0.707 to 0.786. Morisita-Horn overlap for nonserpentine and serpentine fungal  
279 communities in each year was also variable, ranging from 0.535 to 0.725.

### 280 *Leaf tissue chemistry and disease burden*

281 As expected from soil chemistry differences, leaf chemistry in plants grown on serpentine  
282 versus nonserpentine soil differed in mean C, N, Ca, Mg, Ni, and P content, and in Ca:Mg ratio.

283 Serpentine plants had significantly lower mean Ca, C, N, and P content and Ca:Mg ratio than  
284 nonserpentine plants and significantly higher Ni and Mg (Table S-7, Figure 4). Cr content and  
285 C:N ratio were similar for both soil types. Nitrogen content in asymptomatic foliar tissue from  
286 plants surveyed in the field was positively related to the percentage of diseased tissue observed  
287 for nonserpentine, but not serpentine plants, based on Pearson's product-moment correlation (for  
288 N: nonserpentine cor. = 0.328, p-value = 0.012, serpentine cor. = -0.19, p-value = 0.14; for C:  
289 nonserpentine cor. = 0.08, p-value = 0.53, serpentine cor. = -0.04, p-value = 0.76) (Figure 5).

## 290 **Discussion**

291 Here we show that a diverse suite of pathogens caused ubiquitous, low-grade damage on  
292 host individuals across growing seasons and environmental conditions, and that plant populations  
293 and communities appeared to shape the diversity and composition of fungal pathogen  
294 communities in this system. The consistent presence of low-grade foliar disease in *S. pulchra* and  
295 evidence from recent work suggesting that these symptoms inflict only minimal plant fitness  
296 costs (Spear and Mordecai 2018, Uricchio et al. 2018) imply a coevolutionary relationship  
297 between *S. pulchra* and its foliar pathogens that has led to plant-fungal interactions nearer the  
298 commensal than the parasitic end of the symbiotic spectrum. This finding contrasts with  
299 prevalent hypotheses that disease plays a major role in structuring plant communities by  
300 regulating host population dynamics through mechanisms including enemy escape effects,  
301 density- or distance-dependent Janzen-Connell effects, and epidemic-driven community shifts  
302 (Janzen 1970, Connell J.H. 1971, Day and Monk 1974, Keane and Crawley 2002, Mitchell and  
303 Power 2003, Petermann et al. 2008, Mordecai 2011). While evidence from tropical climates  
304 supports these hypotheses (Mangan et al. 2010, Bagchi et al. 2014, Spear et al. 2015), this study  
305 adds to a small body of literature from Mediterranean and semi-arid grasslands that indicates  
306 little to no role for such mechanisms (Mordecai 2013, Spear and Mordecai 2018, Uricchio et al.

307 2018). However, we did not address pathogens with potential for more direct impacts on plant  
308 survival and fecundity, such as flower, seed, and seedling pathogens (Gilbert 2002).

309 As predicted, the chemical composition of *S. pulchra* reflected the chemistry of the soil in  
310 which it grew (except for Cr levels) (Oze et al. 2008) (Figure 4, Table S-7). Contrary to our  
311 hypothesis, differences in soil chemistry that extended to plant chemistry did not affect disease  
312 burden (Figures 1 and 4, Table S-6). Elevated heavy metal content in serpentine-grown plants  
313 was far below “hyperaccumulation” levels that have been shown to inhibit pathogenic infection  
314 in plants (e.g.,  $1.92 \times 10^{-2}$  mol Cr/kg required for hyperaccumulation versus  $3.30 \times 10^{-4}$  mol  
315 Cr/kg observed in serpentine *S. pulchra*) (Jaffre et al. 1976, Brooks et al. 1977, Boyd et al. 1994,  
316 Martens and Boyd 1994, Table S-7), but the consistently low disease burden observed in both  
317 soil types suggests that *S. pulchra* is able to effectively resist or suppress damage by foliar  
318 pathogens such that heightened defenses via opportunistic hyperaccumulation would provide  
319 little to no fitness benefit.

320 This study provides some of the first evidence that local growing conditions influence  
321 structure of the pathogen communities of a single host species even over relatively small spatial  
322 scales of a few hundred meters (Figure 1a, Figure 3). The close proximity of the sampled  
323 nonserpentine and serpentine plants suggests that environmental filtering, rather than dispersal  
324 limitation, plays a key role in fungal community assembly. We hypothesize that either tissue  
325 chemistry, plant community composition, or both influence the composition of fungal  
326 communities and their variation across environments.

327 Differing heavy metal content in the leaves of nonserpentine and serpentine *S. pulchra*  
328 may influence fungal community assembly through a variety of mechanisms. Soil Ca content is  
329 known to influence the outcomes of plant-pathogen interactions through its roles in cellular and

330 biochemical pathways in both the plant immune system (Lamb et al. 1989, Levine et al. 1996,  
331 Blumwald et al. 1998, Romeis et al. 2001) and fungal pathogen virulence, growth, and  
332 reproduction (Magalhães et al. 1991, Warwar and Dickman 1996, Lee and Lee 1998, Sebghati et  
333 al. 2000, Shaw and Hoch 2000, Uhm et al. 2003, Brandhorst et al. 2005). Fungal pathogen  
334 interspecific variation in reliance on Ca for successful infection and/or fungal response to Ca-  
335 dependent plant immune defenses could therefore explain differences in nonserpentine and  
336 serpentine fungal community composition. Previous studies showed that *Hesperolinon* sp.  
337 infection frequency and severity by the fungal rust *Melampsora lini* in California grasslands  
338 depended on plant tissue Ca levels linked to serpentine soil chemistry (Springer et al. 2006,  
339 Springer 2009). Divergent tolerances of heavy metals other than Ca among fungi may act as  
340 additional filters on the species present in nonserpentine and serpentine communities (Iram et al.  
341 2009).

342 Differences in nonserpentine and serpentine fungal communities may also result from  
343 differences in the plant community. Serpentine *S. pulchra* pathogen communities were more  
344 diverse than nonserpentine communities at the species, genus, family, order, and class levels  
345 (Tables S-1 through S-6). Results from previous studies that demonstrate a positive relationship  
346 between host diversity and pathogen diversity indicate that higher plant species diversity in  
347 serpentine grasslands might contribute to higher fungal diversity if native forbs and bunchgrasses  
348 that specialize on serpentine soils share foliar fungal pathogens with *S. pulchra* (Hechinger and  
349 Lafferty 2005, Kamiya et al. 2014, Spear 2017). Research on five common invasive and native  
350 grasses (including *S. pulchra*) at JRBP shows that multi-host foliar fungal pathogens dominate  
351 this system, supporting this hypothesis (Spear and Mordecai 2018).

352 Alternatively, serpentine and nonserpentine fungal communities could differ due to  
353 genetic divergence between the *S. pulchra* populations found in these soils. The gene-for-gene

354 model of the evolution of virulence hypothesizes that a given pathogen can infect a given host  
355 only if the pathogen does not possess an avirulence gene recognized by a matching resistance  
356 gene in the host (Flor 1956, Parker and Gilbert 2004). To date, there have been few studies of  
357 genetic differences between serpentine and nonserpentine populations of the same plant species.  
358 However, genetic and chemical analyses of serpentine and nonserpentine populations of the  
359 native forb *Lasthenia californica* at JRBP show that these populations represent two  
360 phylogenetically distinct species and that each species both accumulates ions in significantly  
361 different concentrations and has a unique flavonoid profile (Desrochers and Bohm 1993,  
362 Rajakaruna and Bohm 1999, Chan et al. 2002, Rajakaruna et al. 2003). Since many flavonoids  
363 have antifungal properties, serpentine and nonserpentine *S. pulchra* could also contain different  
364 genotypes with different potential for resistance to any given fungus due to divergent resistance  
365 gene and/or flavonoid profiles (Parker and Gilbert 2004, Treutter 2006).

366       Species turnover between years contributed substantially to fungal diversity (Table 1,  
367 Table S-6, Figure 3), and species accumulation curves suggest that many more fungal species  
368 remain to be discovered in this system (Figure S-1). Between-year variation in these  
369 communities may be due to highly variable annual precipitation (2015 rainfall = 491mm; 2016 =  
370 604mm, 2017 = 985mm) (Weather Underground). Timing and amount of precipitation might  
371 alter infection dynamics by washing away fungal spores, transmitting spores to new hosts, and/or  
372 influencing plant community composition (Hobbs and Mooney 1991, Madden 1997). The year-  
373 to-year dissimilarity of fungal pathogen communities hosted by *S. pulchra* in both serpentine and  
374 nonserpentine soils highlights the necessity of long-term data collection to accurately  
375 characterize plant-disease interaction networks. This temporal variability also points to the  
376 potential importance of the storage effect, in which temporally variable environmental conditions  
377 act as ecological niches that facilitate species diversity, in maintaining diverse fungal



378 communities in California grasslands (Warner and Chesson 1985).

379           The variation in fungal community composition we observed on a single host species  
380 with soil chemistry and over time suggests possible mechanisms preventing foliar disease from  
381 regulating plant host populations in California grasslands. Transitions between distinct soil types  
382 over spatial scales within the range of fungal spore dispersal may prevent disease outbreaks by  
383 hampering the spread of pathogens that are more or less virulent depending on leaf tissue  
384 chemistry. Variable climatic conditions favoring successful infection by different fungal species  
385 each growing season (Table S-6), combined with plant senescence during the dry season each  
386 year, suggest temporal barriers to pathogens evolving high virulence on both nonserpentine and  
387 serpentine plants. The processes that limit disease burden and impact in *S. pulchra* suggest that  
388 climate and growth form may explain differences with previous studies that reported larger  
389 pathogen impacts. For example, seasonal senescence and local environmental barriers to  
390 transmission in semi-arid and Mediterranean systems may limit the severity of individual  
391 pathogen outbreaks, in contrast to year-round suitable climates and potentially more homogenous  
392 biotic and abiotic environments in tropical systems. Life histories that promote the accumulation  
393 of large disease burdens, along with relatively high and constant humidity, may be important  
394 determinants of the potential for fungal pathogens to structure plant communities.

395           Clarifying the specific mechanisms that drive differences in serpentine and nonserpentine  
396 fungal communities will require inoculation experiments to test how plant susceptibility to  
397 infection by different fungal species changes with plant tissue chemistry and plant genetics.  
398 Additionally, characterization of comprehensive plant-pathogen networks including all plant  
399 species co-occurring with *S. pulchra* in serpentine and nonserpentine grasslands will improve our  
400 understanding of the role of the surrounding plant community in structuring fungal pathogen  
401 communities.

402 *Conclusions*

403 Fungi associated with foliar disease in the native bunchgrass *S. pulchra* are relatively  
404 benign and are unlikely to maintain the diversity of grassland plants, but contribute substantially  
405 to the overall biodiversity of California grasslands. The high taxonomic diversity and rarity of  
406 serpentine fungi demonstrates that this community is potentially at risk of species loss via host-  
407 parasite coextinction as annual grasses continue to expand their ranges at the cost of native  
408 plants, and human activities including development and increased C and N deposition contribute  
409 to the loss of serpentine grasslands that already make up <2% of the California's surface area  
410 (Huenneke et al. 1990, Vallano et al. 2012). This work demonstrates that, in addition to >200  
411 endemic plant species, California's serpentine grasslands support unique communities of  
412 symbiotic fungi, providing additional motivation for active conservation of native grassland  
413 communities based on the far-reaching loss of biodiversity across trophic levels associated with  
414 their disappearance (Sprent 1992, Dobson et al. 2008, Dunn et al. 2009, Lafferty 2012).

415 **Acknowledgements**

416 We thank Nona Chiariello, Caroline Daws, Joe Wan, Peter Vitousek, Scott Fendorf, Lawrence  
417 Uricchio, Guangchao Li, Douglas Turner, Virginia Walbot, Cody Hamilton, and the Mordecai  
418 and Peay Lab Groups for their help. This work was supported by the Jasper Ridge Kennedy  
419 Endowment, the National Science Foundation (DEB-1518681), Stanford Vice Provost for  
420 Undergraduate Education, and Stanford Bio-X.

421

422 **References**

423 Abbate, J. L., and J. Antonovics. 2014. Elevational disease distribution in a natural plant–  
424 pathogen system: insights from changes across host populations and climate. *Oikos*  
425 123:1126–1136.

426 Abou-Shanab, R. A., J. S. Angle, T. A. Delorme, R. L. Chaney, P. Van Berkum, H. Moawad, K.  
427 Ghanem, and H. A. Ghazlan. 2003. Rhizobacterial effects on nickel extraction from soil and  
428 uptake by *Alyssum murale*. *New Phytologist* 158:219–224.

429 Ackerly, D. D., C. A. Knight, S. B. Weiss, K. Barton, and K. P. Starmer. 2002. Leaf size,  
430 specific leaf area and microhabitat distribution of chaparral woody plants: Contrasting  
431 patterns in species level and community level analyses. *Oecologia* 130:449–457.

432 Anderson, M. J. 2001. A new method for non-parametric multivariate analysis of variance.  
433 *Austral Ecology* 26:32–46.

434 Bagchi, R., R. E. Gallery, S. Gripenberg, S. J. Gurr, L. Narayan, C. E. Addis, R. P. Freckleton,  
435 and O. T. Lewis. 2014. Pathogens and insect herbivores drive rainforest plant diversity and  
436 composition. *Nature* 506:85–88.

437 Blumwald, E., G. S. Aharon, and B. C-H. Lam. 1998. Early signal transduction pathways in  
438 plant-pathogen interactions. *Trends in Plant Science* 3:342–346.

439 Borer, E. T., A. Laine, and E. W. Seabloom. 2016. A multiscale approach to plant disease using  
440 the metacommunity concept. *Annual Review of Phytopathology* 54:397–418.

441 Boyd, R. S., J. J. Shaw, and S. N. Martens. 1994. Nickel hyperaccumulation defends  
442 *Streptanthus polygaloides* (Brassicaceae) against pathogens. *American Journal of Botany*

- 443 81:294–300.
- 444 Brady, K. U., A. R. Kruckeberg, and H. D. Bradshaw Jr. 2005. Evolutionary ecology of plant  
445 adaptation to serpentine soils. *Annual Review of Ecology, Evolution, and Systematics*  
446 36:243–266.
- 447 Brandhorst, T. T., G. M. Gauthier, R. A. Stein, and B. S. Klein. 2005. Calcium binding by the  
448 essential virulence factor BAD-1 of *Blastomyces dermatitidis*. *Journal of Biological*  
449 *Chemistry* 280:42156–42163.
- 450 Brooks, R. R., J. Lee, R. D. Reeves, and T. Jaffre. 1977. Detection of nickeliferous rocks by  
451 analysis of herbarium specimens of indicator plants. *Journal of Geochemical Exploration*  
452 7:49–57.
- 453 Cantarelli, M. A., R. G. Pellerano, L. A. Del Vitto, E. J. Marchevsky, and J. M. Camiña. 2010.  
454 Characterisation of two South American food and medicinal plants by chemometric  
455 methods based on their multielemental composition. *Phytochemical Analysis* 21:550–555.
- 456 Chan, R., B. G. Baldwin, and R. Ornduff. 2002. Cryptic goldfields: A molecular phylogenetic  
457 reinvestigation of *Lasthenia californica* sensu lato and close relatives (Compositae:  
458 *Heliantheae* sensu lato). *American Journal of Botany* 89:1103–1112.
- 459 Chao, A., K. H. Ma, T. C. Hsieh, and C.-H. Chiu. 2016. SpadeR: Species prediction and  
460 diversity estimation with R.
- 461 Ciompi, S., E. Gentili, L. Guidi, and G. F. Soldatini. 1996. The effect of nitrogen deficiency on  
462 leaf gas exchange and chlorophyll fluorescence parameters in sunflower. *Plant Science*  
463 118:177–184.
- 464 Coley-Smith, J. R., and R. C. Cooke. 1971. Survival and Germination of Fungal Sclerotia.

- 465 Annual Review of Phytopathology:65–92.
- 466 Connell J.H. 1971. On the role of natural enemies in preventing competitive exclusion in some  
467 marine animals and in rain forest trees. Dynamics of numbers in populations. Proceedings  
468 of the Advanced Study Institute. Centre for Agricultural Publication and Documentation,  
469 Wageningen, The Netherlands:298–312.
- 470 Cunningham, S. A., B. Summerhayes, and M. Westoby. 1999. Evolutionary divergences in leaf  
471 structure and chemistry, comparing rainfall and soil nutrient gradients. *Ecology* 69:569–  
472 588.
- 473 Day, F. P., and C. D. Monk. 1974. Vegetation patterns on a southern Appalachian watershed.  
474 *Ecology* 55:1064–1074.
- 475 Desrochers, A. M., and B. A. Bohm. 1993. Flavonoid variation in *Lasthenia californica*  
476 (Asteraceae). *Biochemical Systematics and Ecology* 21:449–453.
- 477 Dobson, A., K. D. Lafferty, A. M. Kuris, R. F. Hechinger, and W. Jetz. 2008. Homage to  
478 Linnaeus: how many parasites? how many hosts? *Proceedings of the National Academy of*  
479 *Sciences* 105:11482–11489.
- 480 Dormann, C. F., B. Gruber, and J. Freund. 2008. Introducing the bipartite package: analysing  
481 ecological networks. *R news* 8:8–11.
- 482 Dunn, R. R., N. C. Harris, R. K. Colwell, L. P. Koh, and N. S. Sodhi. 2009. The sixth mass  
483 coextinction: are most endangered species parasites and mutualists? *Proceedings of the*  
484 *Royal Society B: Biological Sciences* 276:3037–3045.
- 485 Eviner, V. T. 2016. Grasslands. Pages 449–477 *Ecosystems of California*. University of  
486 California Press.

- 487 Fisher, R. A., A. S. Corbet, and C. B. Williams. 1943. The relation between the number of  
488 species and the number of individuals in a random sample of an animal population. Source  
489 *Journal of Animal Ecology* 12:42–58.
- 490 Flor, H. H. 1956. The complementary genic systems in flax and flax rust. *Advances in Genetics*  
491 8:29–54.
- 492 Gilbert, G. S. 2002. Evolutionary ecology of plant diseases in natural ecosystems. *Annual*  
493 *Review of Phytopathology* 40:13–43.
- 494 Hansen, R. A., and D. C. Coleman. 1998. Litter complexity and composition are determinants of  
495 the diversity and species composition of oribatid mites (Acari: Oribatida) in litterbags.  
496 *Applied Soil Ecology* 9:17–23.
- 497 Harrison, S. P., and J. H. Viers. 2007. *Serpentine Grasslands*. Pages 145–155 *California*  
498 *Grasslands: Ecology and Management*. University of California Press.
- 499 Hechinger, R. F., and K. D. Lafferty. 2005. Host diversity begets parasite diversity: bird final  
500 hosts and trematodes in snail intermediate hosts. *Proceedings of the Royal Society B:*  
501 *Biological Sciences* 272:1059–1066.
- 502 Heinze, J., J. Bergmann, M. C. Rillig, and J. Joshi. 2015. Negative biotic soil-effects enhance  
503 biodiversity by restricting potentially dominant plant species in grasslands. *Perspectives in*  
504 *Plant Ecology, Evolution and Systematics* 17:227–235.
- 505 Hervé, M. "RVAideMemoire: testing and plotting procedures for biostatistics. . R. package  
506 version 0. 9–6. (2017). 2017. RVAideMemoire: testing and plotting procedures for  
507 biostatistics.
- 508 Hobbs, R. J., and H. A. Mooney. 1985. Community and population dynamics of serpentine

- 509 annual grassland in relation to gopher disturbances. *Oecologia* 67:342–351.
- 510 Hobbs, R. J., and H. A. Mooney. 1991. Effects of rainfall variability and gopher disturbance on  
511 serpentine annual grassland dynamics. *Ecology* 72:59–68.
- 512 Huenneke, L. F., S. P. Hamburg, R. Koide, H. A. Mooney, P. M. Vitousek, L. F. Huenneke, S. P.  
513 Hamburg, R. Koide, H. A. Mooney, and P. M. Vitousek. 1990. Effects of soil resources on  
514 plant invasion and community structure in Californian serpentine grassland. *Ecology*  
515 71:478–491.
- 516 Iram, S., I. Ahmad, B. Javed, S. Yaqoob, K. Akhtar, M. R. Kazmi, and Badar-uz-Zaman. 2009.  
517 Fungal tolerance to heavy metals. *Pakistan Journal of Botany* 41:2583–2594.
- 518 Jaffre, T., R. R. Brooks, J. Lee, and R. D. Reeves. 1976. *Sebertia acuminata*: a hyperaccumulator  
519 of nickel from New Caledonia. *Science* 193:579–580.
- 520 Janzen, D. H. 1970. Herbivores and the number of tree species in tropical forests. *The American*  
521 *Naturalist* 104:501–528.
- 522 Jost, L., A. Chao, and R. L. Chazdon. 2011. Compositional similarity and beta diversity. Page  
523 345 in A. E. Magurran and B. J. McGill, editors. *Biological diversity: frontiers in*  
524 *measurement and assessment*. Oxford University Press, Oxford, England.
- 525 Kamiya, T., K. O’Dwyer, S. Nakagawa, and R. Poulin. 2014. Host diversity drives parasite  
526 diversity: meta-analytical insights into patterns and causal mechanisms. *Ecography* 37:689–  
527 697.
- 528 Keane, R. M., and M. J. Crawley. 2002. Exotic plant invasions and the enemy release hypothesis.  
529 *Trends in Ecology and Evolution* 17:164–170.
- 530 Kindt, R., and R. Coe. 2005. *BiodiversityR*. Tree diversity analysis. A manual and software for

- 531 common statistical methods for ecological and biodiversity studies. World Agroforestry  
532 Centre (ICRAF), Nairobi.
- 533 Lafferty, K. D. 2012. Biodiversity loss decreases parasite diversity: Theory and patterns.  
534 Philosophical Transactions of the Royal Society B: Biological Sciences 367:2814–2827.
- 535 Lamb, C. J., M. A. Lawton, M. Dron, and R. A. Dixon. 1989. Signals and transduction  
536 mechanisms for activation of plant defenses against microbial attack. *Cell* 56:215–224.
- 537 Lee, S. C., and Y. H. Lee. 1998. Calcium/calmodulin-dependent signaling for appressorium  
538 formation in the plant pathogenic fungus *Magnaporthe grisea*. *Molecules & Cells* 8:698–  
539 704.
- 540 Levine, A., R. I. Pennell, M. E. Alvarez, R. Palmer, and C. Lamb. 1996. Calcium-mediated  
541 apoptosis in a plant hypersensitive disease resistance response. *Current Biology* 6:427–437.
- 542 Madden, L. V. 1997. No effects of rain on splash dispersal of fungal pathogens. *Canadian*  
543 *Journal of Plant Pathology* 19:225–230.
- 544 Magalhães, B. P., R. Wayne, R. A. Humber, E. J. Shields, and D. W. Roberts. 1991. Calcium-  
545 regulated appressorium formation of the entomopathogenic fungus *Zoophthora radicans*.  
546 *Protoplasma* 160:77–88.
- 547 Magurran, A. E. 1988. Ecological diversity and its measurement. Chapman & Hall.
- 548 Mangan, S. A., S. A. Schnitzer, E. A. Herre, K. M. L. MacK, M. C. Valencia, E. I. Sanchez, and  
549 J. D. Bever. 2010. Negative plant-soil feedback predicts tree-species relative abundance in a  
550 tropical forest. *Nature* 466:752–755.
- 551 Martens, S. N., and R. S. Boyd. 1994. The ecological significance of nickel hyperaccumulation:  
552 a plant chemical defense. *Oecologia* 98:379–384.



- 553 McElrone, A. J., C. D. Reid, K. A. Hoye, E. Hart, and R. B. Jackson. 2005. Elevated CO<sub>2</sub>  
554 reduces disease incidence and severity of a red maple fungal pathogen via changes in host  
555 physiology and leaf chemistry. *Global Change Biology* 11:1828–1836.
- 556 McNaughton, S. J. 1968. Structure and function in California grasslands. *Ecology* 49:962–972.
- 557 Mitchell, C. E., and A. O. Power. 2003. Release of invasive plants from fungal and viral  
558 pathogens. *Nature* 421:625–627.
- 559 Mordecai, E. A. 2011. Pathogen impacts on plant communities: unifying theory, concepts, and  
560 empirical work. *Ecological Monographs* 81:429–441.
- 561 Mordecai, E. A. 2013. Consequences of pathogen spillover for cheatgrass-invaded grasslands:  
562 coexistence, competitive exclusion, or priority effects. *The American Naturalist* 181:737–  
563 47.
- 564 O’Brien, H. E., J. L. Parrent, J. A. Jackson, J. Moncalvo, and R. Vilgalys. 2005. Fungal  
565 community analysis by large-scale sequencing of environmental samples. *Applied and  
566 Environmental Microbiology* 71:5544–5550.
- 567 Oksanen, J., R. Kindt, P. Legendre, and B. O’Hara. 2016. *Vegan: community ecology package*.
- 568 Osbourne, A. E. 1996. Preformed antimicrobial compounds and plant defense against fungal  
569 attack. *The Plant Cell* 8:1821–1831.
- 570 Oze, C., S. Fendorf, D. K. Bird, and R. G. Coleman. 2004. Chromium geochemistry in  
571 serpentinized ultramafic rocks and serpentine soils from the Franciscan complex of  
572 California. *American Journal of Science* 304:67–101.
- 573 Oze, C., C. Skinner, A. W. Schroth, and R. G. Coleman. 2008. Growing up green on serpentine  
574 soils: biogeochemistry of serpentine vegetation in the Central Coast Range of California.

- 575           Applied Geochemistry 23:3391–3403.
- 576   Parker, I. M., and G. S. Gilbert. 2004. The evolutionary ecology of novel plant-pathogen  
577           interactions. *Annual Review of Ecology, Evolution, and Systematics* 35:675–700.
- 578   Parker, I. M., M. Saunders, M. Bontrager, A. P. Weitz, R. Hendricks, R. Magarey, K. Suiter, and  
579           G. S. Gilbert. 2015. Phylogenetic structure and host abundance drive disease pressure in  
580           communities. *Nature* 520:542–544.
- 581   Petermann, J. S., A. J. F. Fergus, L. A. Turnbull, and B. Schmid. 2008. Janzen-Connell effects  
582           are widespread and strong enough to maintain diversity in grasslands. *Ecology* 89:2399–  
583           2406.
- 584   Proctor, J., and S. R. J. Woodell. 1975. The ecology of serpentine soils. *Advances in Ecological*  
585           *Research* 9:255–366.
- 586   Rajakaruna, N., B. G. Baldwin, R. Chan, A. M. Desrochers, B. A. Bohm, and J. Whitton. 2003.  
587           Edaphic races and phylogenetic taxa in the *Lasthenia californica* complex (Asteraceae:  
588           Heliantheae): an hypothesis of parallel evolution. *Molecular Ecology* 12:1675–1679.
- 589   Rajakaruna, N., and B. A. Bohm. 1999. The edaphic factor and patterns of variation in *Lasthenia*  
590           *californica* (Asteraceae). *American Journal of Botany* 86:1576–1596.
- 591   Rascio, N., and F. Navari-Izzo. 2011. Heavy metal hyperaccumulating plants: how and why do  
592           they do it? and what makes them so interesting? *Plant Science* 180:169–181.
- 593   Romeis, T., A. A. Ludwig, R. Martin, and J. D. G. Jones. 2001. Calcium-dependent protein  
594           kinases play an essential role in a plant defence response. *EMBO Journal* 20:5556–5567.
- 595   Rossi, J.-P. 2011. rich: an R package to analyse species richness. *Diversity* 3:112–120.

- 596 Seabloom, E. W., E. T. Borer, K. Gross, A. E. Kendig, C. Lacroix, C. E. Mitchell, E. A.  
597 Mordecai, and A. G. Power. 2015. The community ecology of pathogens: coinfection,  
598 coexistence and community composition. *Ecology Letters* 18:401–415.
- 599 Sebghati, T. S., J. T. Engle, and W. E. Goldman. 2000. Intracellular parasitism by *Histoplasma*  
600 *capsulatum*: fungal virulence and calcium dependence. *Science* 290:1368–1372.
- 601 Shaw, B. D., and H. C. Hoch. 2000. Ca<sup>2+</sup> regulation of *Phyllosticta ampellicida* pycnidiospore  
602 germination and appressorium formation. *Fungal Genetics and Biology* 31:43–53.
- 603 Smith, V. 2007. Host resource supplies influence the dynamics and outcome of infectious  
604 disease. *Integrative and Comparative Biology* 47:310–316.
- 605 Spear, E. R. 2017. Phylogenetic relationships and spatial distributions of putative fungal  
606 pathogens of seedlings across a rainfall gradient in Panama. *Fungal Ecology* 26:65–73.
- 607 Spear, E. R., P. D. Coley, and T. A. Kursar. 2015. Do pathogens limit the distributions of tropical  
608 trees across a rainfall gradient? *Journal of Ecology* 103:165–174.
- 609 Spear, E. R., and E. A. Mordecai. (n.d.). Foliar pathogens do not stabilize coexistence of  
610 competing species in a California grassland. *Ecology*.
- 611 Spear, E. R., and E. A. Mordecai. 2018. Foliar pathogens do not stabilize coexistence of  
612 competing species in a California grassland. *Ecology* 0:1–10.
- 613 Sprent, J. F. A. 1992. Parasites lost? *International Journal for Parasitology* 22:139–151.
- 614 Springer, Y. P. 2009. Do extreme environments provide a refuge from pathogens? A  
615 phylogenetic test using serpentine flax. *American Journal of Botany* 96:2010–2021.
- 616 Springer, Y. P., B. A. Hardcastle, and G. S. Gilbert. 2006. Soil calcium and plant disease in

- 617 serpentine ecosystems: A test of the pathogen refuge hypothesis. *Oecologia* 151:10–21.
- 618 Tadros, T. M. 1957. Evidence of the presence of an edapho-biotic factor in the problem of  
619 serpentine tolerance. *Ecology* 38:14–23.
- 620 Telfer, S., X. Lambin, R. Birtles, P. Beldomenico, S. Burthe, S. Paterson, and M. Begon. 2010.  
621 Species interactions in a parasite community drive infection risk in a wildlife population.  
622 *Science* 330:243–247.
- 623 Treutter, D. 2006. Significance of flavonoids in plant resistance: a review. *Environmental*  
624 *Chemistry Letters* 4:147–157.
- 625 Uhm, K.-H., I.-P. Ahn, S. Kim, and Y.-H. Lee. 2003. Calcium/calmodulin-dependent signaling  
626 for prepenetration development in *Colletotrichum gloeosporioides*. *Phytopathology* 93:82–  
627 87.
- 628 Uricchio, L. H., S. C. Daws, E. R. Spear, and E. A. Mordecai. 2018. Exotic species dominate due  
629 to niche overlap in a complex grassland community. in review:1–35.
- 630 Vallano, D. M., P. C. Selmants, and E. S. Zavaleta. 2012. Simulated nitrogen deposition  
631 enhances the performance of an exotic grass relative to native serpentine grassland  
632 competitors. *Plant Ecology* 213:1015–1026.
- 633 Vavrek, M. J. 2011. Fossil: palaeoecological and palaeogeographical analysis tools.  
634 *Palaeontologia Electronica* 14.
- 635 Warner, R. R., and P. L. Chesson. 1985. Coexistence mediated by recruitment fluctuations: a  
636 field guide to the storage effect. *The American Naturalist* 125:769–787.
- 637 Warwar, V., and M. B. Dickman. 1996. Effects of calcium and calmodulin on spore germination  
638 and appressorium development in *Colletotrichum trifolii*. *Applied and Environmental*

639 Microbiology 62:74–79.

640 Weather Underground. (n.d.). Jasper Ridge Biological Preserve KCAWOODS19.

641 <https://www.wunderground.com/personal-weather-station/dashboard?ID=KCAWOODS19>.

642 Wickham, H. 2016. Ggplot2: elegant graphics for data analysis. Springer-Verlag, New York.

643 Wolda, H. 1981. Similarity indices, sample size and diversity. *Oecologia* 50:296–302.

644 Wolf, D. C., T. H. Dao, H. D. Scott, and T. L. Lavy. 1989. Influence of sterilization methods on  
645 selected soil microbiological, physical, and chemical properties. *Journal of Environment*  
646 *Quality* 18:39.

647

648

649

650

## 651 **Figure legends**

652 **Figure 1. Pathogen damage was consistently low across three years and both grassland**

653 **types.** Panel (a) maps the locations of surveyed nonserpentine sites (blue) and serpentine sites

654 (green) along the ridgetop at JRBP. Panel (b) shows mean percentage (bars) and standard error

655 (error bars) of diseased leaf area for surveyed serpentine and nonserpentine *S. pulchra*, by year.

656 **Figure 2. Pathogens isolated from *Stipa pulchra* growing in nonserpentine and serpentine**

657 **grasslands.** Bipartite network showing species interactions between *S. pulchra* plants (left)

658 growing in serpentine grasslands (green) and nonserpentine grasslands (blue) and fungal species

659 cultured from symptomatic leaf tissue (white bars on the right). The length of each white bar

660 correlates with the number of isolates in the operational species unit (based on 97% sequence  
661 similarity). The thickness of lines connecting left and right bars represents the number of times a  
662 particular fungal species was isolated from *S. pulchra* in a particular grassland type. The  
663 nonserpentine fungi came from 15 genera, 8 families, 4 orders, and 3 classes; the serpentine  
664 fungi came from 20 genera, 14 families, 7 orders, and 5 classes (Tables S-1 to S-6).

665 **Figure 3. Distinct fungal communities isolated from *Stipa pulchra* growing in nearby**  
666 **serpentine and nonserpentine sites across years.** Non-metric multidimensional scaling  
667 visualization of serpentine and nonserpentine fungal community similarity. Each point  
668 corresponds to the combined fungal community of two transects at the same site in the same  
669 year. Serpentine communities are shown in green and nonserpentine communities are shown in  
670 blue. Circles, triangles, and squares represent fungal communities sampled in 2015, 2016, and  
671 2017, respectively. Ellipses enclose 95% confidence intervals for ordination of serpentine and  
672 nonserpentine communities. Community dissimilarity increases with the distance between  
673 points. PERMANOVA analysis showed a significant effect of soil type on fungal community  
674 composition ( $F = 3.623$ ,  $R^2 = 0.0618$ ,  $p = 0.001$ ).

675 **Figure 4. Plants grown in nonserpentine soil had higher C, N, P, Ca, and Ca:Mg and lower**  
676 **Mg and Ni than those grown in serpentine soil.** Box plots comparing elemental content of  
677 dried foliar tissue from nonserpentine- and serpentine-grown *S. pulchra*. In each plot, the thick  
678 black bar represents the median, the height of the box represents the interquartile range (IQR),  
679 the whiskers represent the maximum and minimum points within 1.5\*IQR of the 25<sup>th</sup> and 75<sup>th</sup>  
680 percentiles, and the circles represent points outside this range. An asterisk above a panel  
681 indicates a statistically significant difference between serpentine- and nonserpentine-grown  
682 plants ( $p < 0.05$ ) indicated by a Wilcoxon ranked-sum test. Panel (a) shows percent C of dried  
683 foliar tissue ( $W = 2713$ ,  $p\text{-value} = 1.65 \times 10^{-7}$ ); panel (b), percent N ( $W = 2346$ ,  $p\text{-value} =$

684 0.0011); panel (c), C:N ratio ( $W = 1398$ ,  $p\text{-value} = 0.066$ ); panel (d), moles P per kilogram dried  
685 leaf tissue ( $W = 390$ ,  $p\text{-value} = 2.83 \times 10^{-9}$ ); panel (e), moles Ca per kilogram dried leaf tissue  
686 ( $W = 400$ ,  $p\text{-value} = 1.45 \times 10^{-11}$ ); panel (f), Ca:Mg ratio ( $W = 400$ ,  $p\text{-value} = 1.451 \times 10^{-11}$ );  
687 panel (g), moles Cr per kilogram dried leaf tissue ( $W = 192.5$ ,  $p\text{-value} = 0.8498$ ); panel (h),  
688 moles Mg per kilogram dried leaf tissue ( $W = 1$ ,  $p\text{-value} = 2.90 \times 10^{-11}$ ); and panel (i), moles Ni  
689 per kilogram dried leaf tissue ( $W = 0$ ,  $p\text{-value} = 6.79 \times 10^{-8}$ ).

690 **Figure 5. C, N, and C:N predict the mean foliar pathogen damage with opposite trends in**  
691 **serpentine versus nonserpentine grasslands.** Foliar percent C (Panels (a) and (b)), percent N  
692 (Panels (c) and (d)) and C:N ratio (Panels (e) and (f)) versus mean percentage of diseased leaf  
693 area for serpentine and nonserpentine *S. pulchra* plants, with linear regression (lines) and 95%  
694 confidence intervals (grey bands). An asterisk following a p-value indicates a statistically  
695 significant result ( $p < 0.05$ ).

696

697 **Figures**

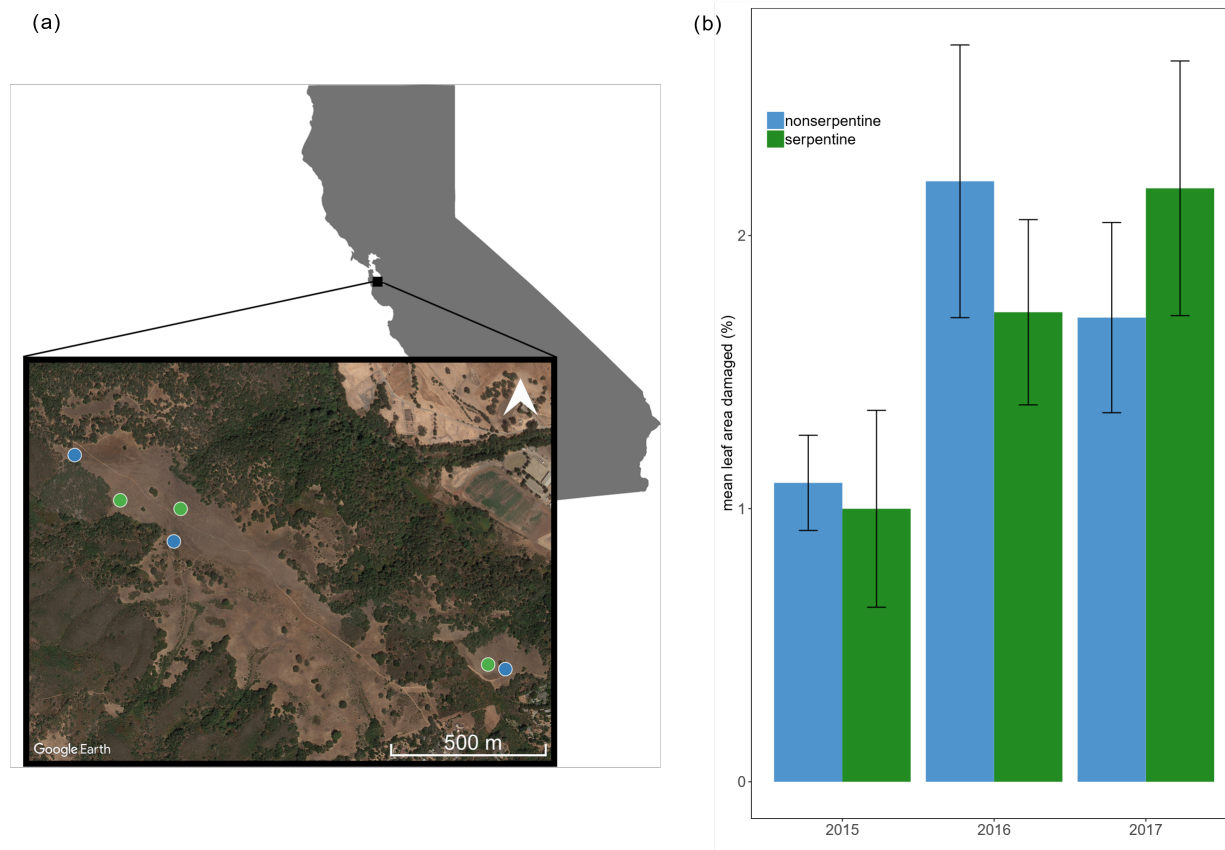

698

699 **Figure 1.**



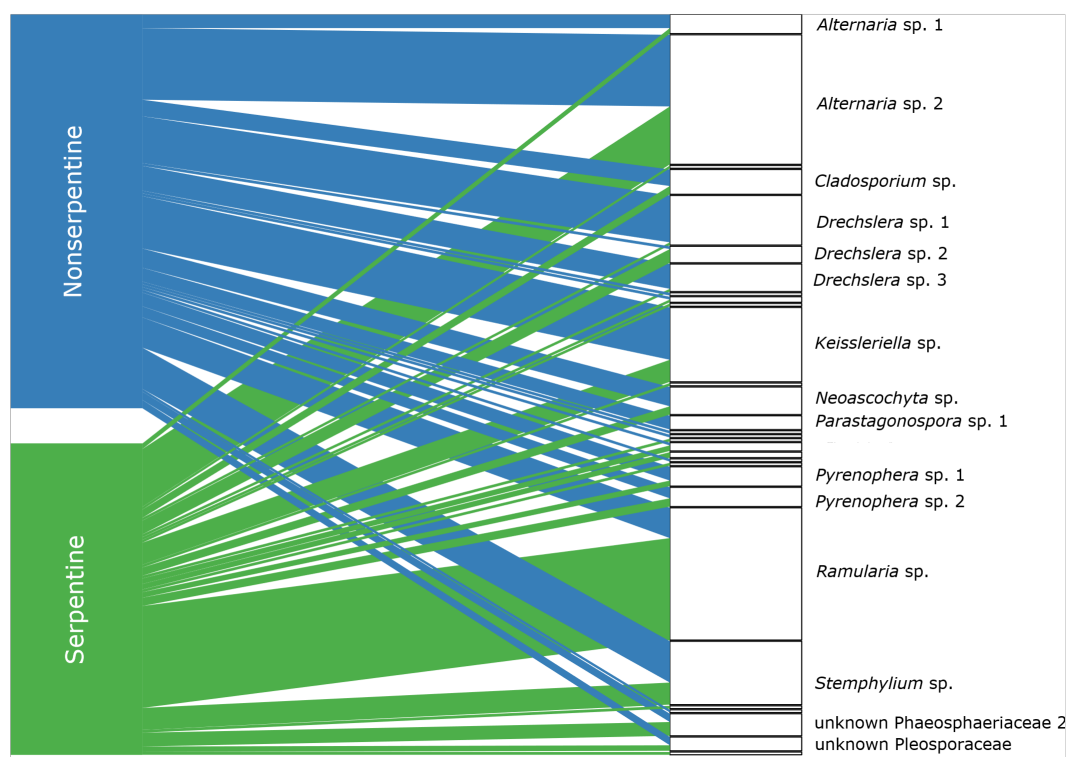

700

701 **Figure 2.**

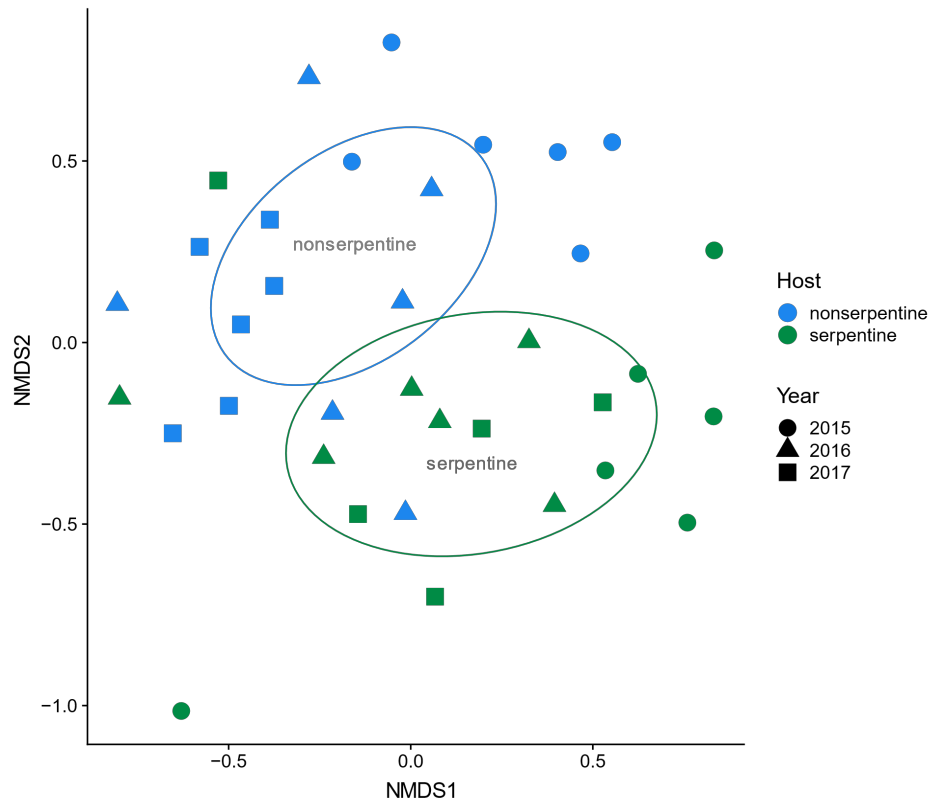

702

703 **Figure 3.**

704

705

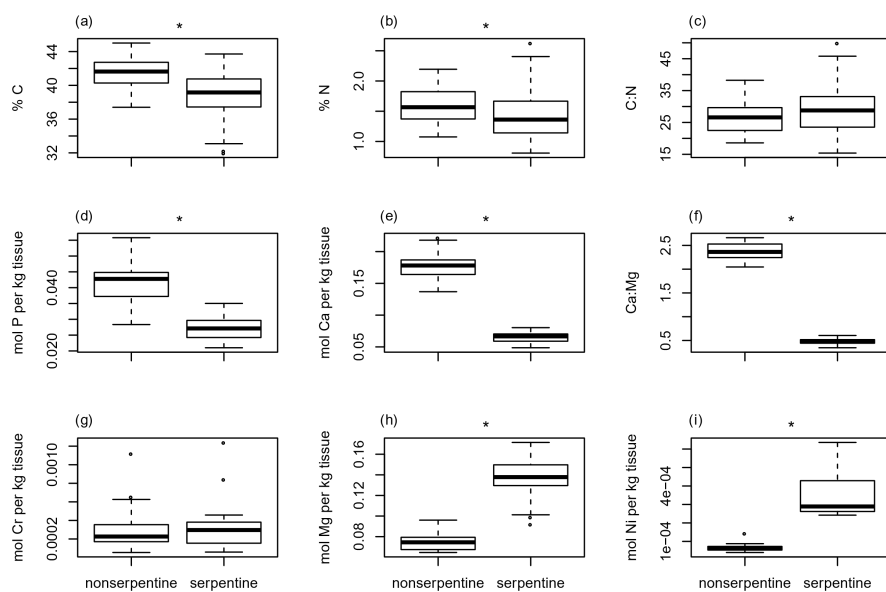

706

707 **Figure 4.**

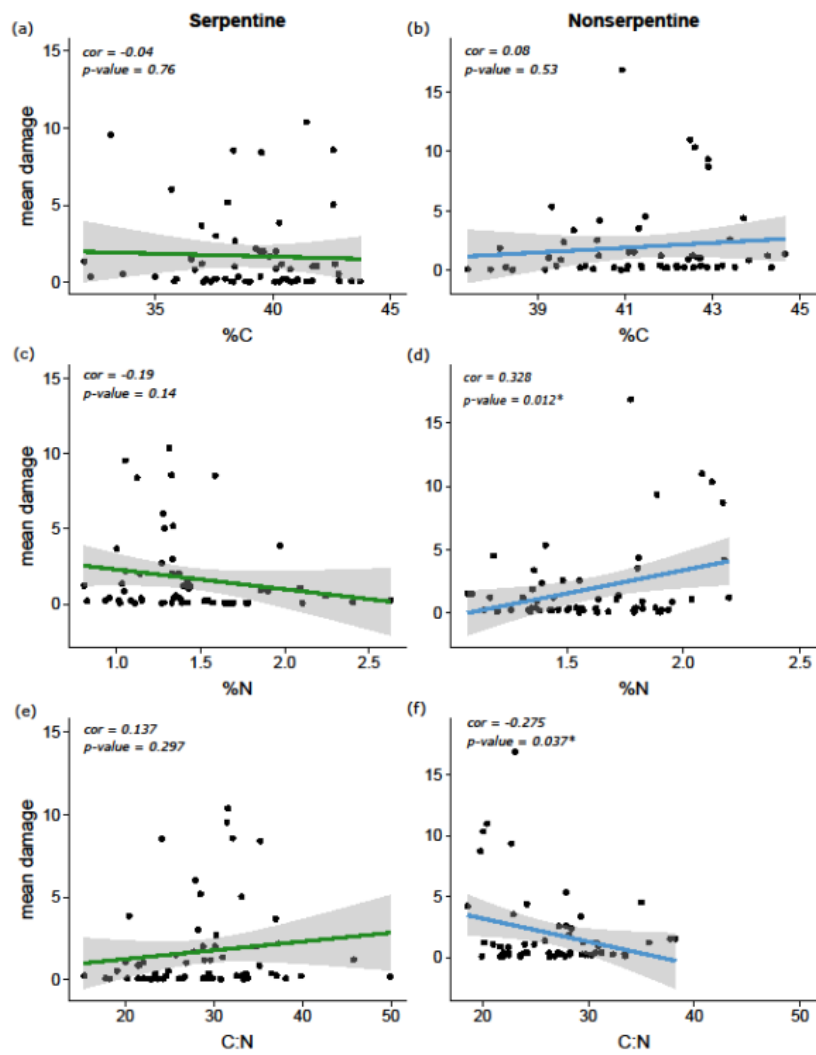

708

709 **Figure 5.**

710

711

712

713

714

715

716 **Tables**

717 **Table 1. Fungal community diversity was higher and communities were distinct in *S.***  
 718 ***pulchra* plants growing in serpentine versus nonserpentine grasslands, across all years.**

719 Fungal community similarity by soil type and year. The leftmost column lists the fungal  
 720 communities considered, with the number of species in each community in parentheses. The  
 721 second column lists Fisher's alpha for each community. The third column shows the number of  
 722 shared species and, in parentheses, the percentage of total observed species that were shared for  
 723 each pair of communities. The rightmost column lists the estimated Morisita-Horn community  
 724 overlap value, based on absolute species abundances, for each pair of communities. The  
 725 Morisita-Horn index ranges from 0 to 1, with 1 indicating complete overlap.

| <b>Fungal community pair</b> | <b>Fisher's<br/>alpha</b> | <b>Shared species</b> | <b>Morisita-Horn<br/>Similarity Index</b> |
|------------------------------|---------------------------|-----------------------|-------------------------------------------|
| All years serpentine (24)    | 9.324                     | 16                    | 0.675                                     |
| All years nonserpentine (22) | 7.261                     | (53.0%)               |                                           |
| 2015 serpentine (11)         | 7.955                     | 5                     | 0.535                                     |
| 2015 nonserpentine (12)      | 5.205                     | (27.8%)               |                                           |
| 2016 serpentine (16)         | 7.897                     | 11                    | 0.766                                     |
| 2016 nonserpentine (13)      | 5.861                     | (61.1%)               |                                           |
| 2017 serpentine (12)         | 6.784                     | 8                     | 0.725                                     |
| 2017 nonserpentine (12)      | 5.136                     | (50.0%)               |                                           |
| 2015 serpentine (11)         | 7.955                     | 7                     | 0.707                                     |
| 2016 serpentine (16)         | 7.897                     | (35.0%)               |                                           |
| 2015 serpentine (11)         | 7.955                     | 5                     | 0.721                                     |
| 2017 serpentine (12)         | 6.784                     | (27.8%)               |                                           |
| 2016 serpentine (16)         | 7.897                     | 7                     | 0.786                                     |
| 2017 serpentine (12)         | 6.784                     | (33.3%)               |                                           |
| 2015 nonserpentine (12)      | 5.205                     | 6                     | 0.668                                     |
| 2016 nonserpentine (13)      | 5.861                     | (31.5%)               |                                           |
| 2015 nonserpentine (12)      | 5.205                     | 5                     | 0.295                                     |
| 2017 nonserpentine (12)      | 5.136                     | (26.3%)               |                                           |
| 2016 nonserpentine (13)      | 5.861                     | 7                     | 0.882                                     |
| 2017 nonserpentine (12)      | 5.136                     | (38.9%)               |                                           |

726
